# Supplementary material
Source: publisher site journal article supplement (http://journals.cambridge.org/download.php?file=%2FPNS%2FS0029665115004255a.pdf&code=ebeaeca8%3Ca%20href='http://www.naturopedia.com/supplement.asp?rId=367'%20class='keyword'%3EB9%3C/a%3E4ed%3Ca%20href='http://www.naturopedia.com/supplement.asp?rId=397'%20class='keyword'%3EB7%3C/a%3Ee388169c5ae3c509)
Supplement: Supplementary file 1 [file a%3Ee388169c5ae3c5095]

 


Processed meat: the real villain? | Proceedings of the Nutrition Society | Cambridge Core


Skip to main content

Accessibility help

We use cookies to distinguish you from other users and to provide you with a better experience on our websites. Close this message to accept cookies or find out how to manage your cookie settings.

## Login Alert

Cancel

Log in

×

×

- Home

- Log in
- Register
- Browse subjects
- Publications
- Open research
- Services
- About Cambridge Core
- Cart

- Cart

- Institution login
- Register
- Log in
- Cart

Home

- Home

- Log in
- Register
- Browse subjects
- Publications
- Open research
- Services
- About Cambridge Core
- Cart

- Cart

- Institution login
- Register
- Log in
- Cart

Hostname: page-component-848d4c4894-ttngx
Total loading time: 0
Render date: 2024-05-07T18:41:00.235Z
Has data issue: false
hasContentIssue false

- Home
- >Journals
- >Proceedings of the Nutrition Society
- >Volume 75 Issue 3
- >Processed meat: the real villain?

- English
- Français

Proceedings of the Nutrition Society
  

---

## Article contents

- Abstract
- Total mortality
- Cancer
- CVD
- Type-2 diabetes mellitus
- Methodological considerations
- Conclusions
- References

# Processed meat: the real villain?

Published online by Cambridge University Press: 
**01 December 2015**

Sabine Rohrmann   and

Jakob Linseisen

Show author details

---

Sabine Rohrmann\*
:   Affiliation:

    Division of Chronic Disease Epidemiology, Epidemiology, Biostatistics and Prevention Institute, University of Zurich, Zurich, Switzerland

Jakob Linseisen
:   Affiliation:

    Institute of Epidemiology II, Helmholtz Zentrum München, Neuherberg, Germany

\*
:   \*Corresponding author: S. Rohrmann, email sabine.rohrmann@uzh.ch

---

- Article
- Figures
- Metrics

Article contents  

- Abstract
- Total mortality
- Cancer
- CVD
- Type-2 diabetes mellitus
- Methodological considerations
- Conclusions
- References

Save PDF

Save PDF (1 mb)
  View PDF
 [Opens in a new window]  Save to Dropbox  Save to Google Drive  Save to Kindle

Share

 Cite Rights & Permissions
 [Opens in a new window]

---

## Abstract

Meat is a food rich in protein, minerals such as iron and zinc as well as a variety of vitamins, in particular B vitamins. However, the content of cholesterol and saturated fat is higher than in some other food groups. Processed meat is defined as products usually made of red meat that are cured, salted or smoked (e.g. ham or bacon) in order to improve the durability of the food and/or to improve colour and taste, and often contain a high amount of minced fatty tissue (e.g. sausages). Hence, high consumption of processed foods may lead to an increased intake of saturated fats, cholesterol, salt, nitrite, haem iron, polycyclic aromatic hydrocarbons, and, depending upon the chosen food preparation method, also heterocyclic amines. Several large cohort studies have shown that a high consumption of processed (red) meat is related to increased overall and cause-specific mortality. A meta-analysis of nine cohort studies observed a higher mortality among high consumers of processed red meat (relative risk (RR) = 1·23; 95 % CI 1·17, 1·28, top v. bottom consumption category), but not unprocessed red meat (RR = 1·10; 95 % CI 0·98, 1·22). Similar associations were reported in a second meta-analysis. All studies argue that plausible mechanisms are available linking processed meat consumption and risk of chronic diseases such as CVD, diabetes mellitus or some types of cancer. However, the results of meta-analyses do show some degree of heterogeneity between studies, and it has to be taken into account that individuals with low red or processed meat consumption tend to have a healthier lifestyle in general. Hence, substantial residual confounding cannot be excluded. Information from other types of studies in man is needed to support a causal role of processed meat in the aetiology of chronic diseases, e.g. studies using the Mendelian randomisation approach.

---

## Keywords

Processed meatRed meatMortalityCancerCVD

---

Type
:   Conference on ‘The future of animal products in the human diet: health and environmental concerns’

Information
:   Proceedings of the Nutrition Society
      
    ,
    Volume 75
      
    ,
    Issue 3
      , August 2016 , pp. 233 - 241

    DOI: https://doi.org/10.1017/S0029665115004255
     [Opens in a new window]

Copyright
:   Copyright © The Authors 2015

Meat is an integral part of human diet in many cultures and in recent years, meat consumption has increased considerably in most parts of the world. According to the Food and Agriculture Organization, world *per capita* meat consumption was just over 30 kg per person per year in 1980; in 2005, it was 41 kg per person per year. As incomes rise, more meat is consumed(

1
). Meat consumption contributes to intake of a number of vitamins and minerals such as vitamin B, vitamin A, zinc and iron. It is also an important source of protein providing essential amino acids; however, meat is also rich in saturated fat and cholesterol. The total fat content of meat varies considerably with average values (median, interquartile range) of 9·3 (5·1–15) g/100 g in beef and 12·4 (4–16·2) g/100 g in pork; the same is true for SFA with values of 3·8 (2·5–6·1) g /100 g in beef and 3·5 (1·4–5·5) g/100 g in pork(
Reference Payne, Scarborough and Rayner
2
). Total fat and saturated fat concentrations are distinctly higher in many types of processed meat, with extreme values of up to 90 g/100 g total fat and 25 g/100 g saturated fat in fatty bacon. Calculations of the contribution of meat and processed meat to the total daily energy intake or the total daily fat intake underpin the important role of meats in present dietary practice(
Reference Linseisen, Kesse and Slimani
3
).

Meat has already been consumed for thousands of years. Prior to the availability of adequate storage such as refrigerators or deep-freezers that can preserve fresh meat for a longer period, preservation by drying, salting, curing or smoking were the only means to be able to provide meat in times when no fresh meat was available. For example, salting and sun-drying was used in ancient Egypt(
Reference Pearson and Gillett
4
). In addition to improving the meat's durability, meat processing is also used to preserve the food's colour and taste.

Salting, i.e. adding NaCl to meat, increases its durability by decreasing the water content of meat and inhibiting micro-organisms(
Reference Toldra and Flores
5
). Curing, that is adding salt enriched with nitrates and nitrites to meat products for preservation purposes, leads to the formation of N-nitroso compounds (NOC) and increases the originally low salt (NaCl) content of fresh meat. Similar to the developments in meat smoking, developments in manufacturing practice, e.g. addition of ascorbic acid, decreased the amount of nitrate/nitrite added to processed meat products in most European countries during past decades(
Reference Honikel
6
).

In addition to this exogenous exposure, there is endogenous nitrate and nitrite generation from inducible and endogenous NO synthases, resulting in NOC production. NOC arise from the reaction of nitrite and secondary or tertiary amines in the intestine from N-nitrosation of amines, which are produced in the colon by bacterial decarboxylation of amino acids(
Reference Bingham, Hughes and Cross
7
). Additionally, haem iron from red but not white meat substantially increases the endogenous production of NOC(
Reference Bingham, Hughes and Cross
7
).

Smoking of meat inactivates enzymes and micro-organisms and influences its taste. As a downside, however, smoke contains polycyclic aromatic hydrocarbons (PAH), which are formed by pyrolytic processes at high smoking temperatures (400–1000°C). The type of wood used, the temperature, the use of smoke flavour additives and whether direct or indirect, hot or cold smoking methods determine the amount of PAH that is produced during this process(
Reference Simko
8
). In the past couple of years, even decades, with improvements in managing the smoking process, the amount of PAH that is produced has decreased considerably(
Reference Behsnilian, Butz and Greiner
9
). In addition to PAH production, smoking also increases the concentration of NOC in food(
Reference Lijinsky
10
,
Reference Haorah, Zhou and Wang
11
).

In this review, we evaluate the current evidence on the association of processed meat consumption with mortality and the incidence of cancer, CVD and diabetes. In addition, we discuss effects of different components in red and processed meat and their possible role in the aetiology of these chronic diseases.

## Total mortality

Several prospective studies evaluated the association between meat intake and mortality(
Reference Kahn, Phillips and Snowdon
12
–
Reference Rohrmann, Overvad and Bueno-de-Mesquita
24
), some of which compared meat consumers with vegetarians(
Reference Fraser
14
,
Reference Appleby, Key and Thorogood
16
,
Reference Chang-Claude, Hermann and Eilber
18
,
Reference Key, Appleby and Spencer
20
). The results of these studies mostly pointed in the direction of a positive association in particular of processed meat, consumption and all-cause mortality. Three meta-analyses have been published in the past 2 years using basically the same studies and coming up with similar results(
Reference Abete, Romaguera and Vieira
25
–
Reference Wang, Lin and Ouyang
27
). In all of them, processed meat consumption was significantly associated with a moderately increased all-cause mortality (Table 1), but the consumption of unprocessed red meat was not.

Table 1. Association between red and processed meat consumption and all-cause and cause-specific mortality: results of meta-analyses

Several of the earlier mentioned cohorts estimated the contribution of high processed meat consumption to total mortality in terms of attributable or preventable fractions. The results of these estimates were quite heterogeneous: In the European Prospective Investigation into Cancer and Nutrition (EPIC) cohort, we estimated that a reduction of processed meat consumption to <20 g/d could reduce the total mortality by 3·3 % (95 % CI 1·5, 5·0 %). In contrast, estimates from US cohorts were much higher. In the American Association of Retired Persons cohort, the preventable fraction was estimated to be 20 % if women decreased their processed meat consumption to less than 1·6 g per 4184 kJ/d (1·6 g per 1000 kcal/d)(
Reference Sinha, Cross and Graubard
19
) and in two other US cohorts, the preventable fraction was estimated to be 9·3 % in the Health Professionals Follow-up Study and 7·6 % in the Nurses’ Health Study if the participants lowered their red meat (processed and unprocessed) consumption to less than 0·5 servings daily. The difference between the US studies and the EPIC result is likely due to the stronger risk estimates observed in the US cohorts compared with EPIC, but may also be explained by higher meat consumption in the US than in Europe as well as differences in meat preparation and cooking.

An analysis of EPIC-Oxford participants observed that vegetarians as well as non-vegetarians with a health-conscious lifestyle had a statistically significantly lower mortality compared with the British general population(
Reference Key, Appleby and Spencer
20
). Similarly, in a study in Germany, both vegetarians and health-conscious non-vegetarians had a statistically significantly lower overall mortality compared with the general population(
Reference Chang-Claude, Hermann and Eilber
18
). The implication of these results is that perhaps the decreased mortality in vegetarians, compared with the general population, is in large part due to a healthier lifestyle, such as having lower body fat, being more physically active, and not being a smoker. However, in the large US and European cohorts that did indeed report an increased risk for early mortality among individuals with a high red and processed meat consumption, this increase in risk was largely independent of smoking, obesity and other potential confounders(
Reference Sinha, Cross and Graubard
19
,
Reference Pan, Sun and Bernstein
23
,
Reference Rohrmann, Overvad and Bueno-de-Mesquita
24
).

## Cancer

The cancer entity that is best studied in relation to meat consumption is colorectal cancer. Numerous case–control and cohort studies have evaluated the question whether red and/or processed meat consumption is associated with risk of this disease. Many of the studies, case–control as well as cohort studies, did indeed observe positive associations between red meat consumption and colorectal cancer risk. In a summary evaluation of the studies published thus far, the World Cancer Research Fund in 2007 came to the conclusion that high consumption of unprocessed red meat and of processed meat were convincingly associated with the risk of colorectal cancer(

28
). This was confirmed in the 2011 updated report. Per 50 g increase in daily processed meat consumption, the relative risk (RR) increased by 18 % (95 % CI 1·10, 1·28); per 100 g increase in daily unprocessed red meat consumption, the RR increased by 17 % (95 % CI 1·05, 1·31)(

29
). Underlining this, the International Agency for Research on Cancer recently declared that there is sufficient evidence in human beings for the carcinogenicity of the consumption of processed meat(
Reference Bouvard, Loomis and Guyton
30
).

In addition to colorectal cancer, high consumption of red and processed meat might be linked to several other cancer entities such as oesophagus, lung, pancreas and endometrium (red meat) as well as oesophagus, lung and stomach (processed meat)(

28
).

Based on these findings, World Cancer Research Fund recommended in their conclusions that red meat intake should be limited to <500 g/week and very little, if any, of this should be processed meat.

Several mechanisms were proposed and examined to explain an increased risk of certain types of cancer with increased meat, particularly processed meat consumption (Table 2).

Table 2. Potential mechanisms connecting meat consumption and risk of chronic diseases

T2D, type-2 diabetes mellitus; PAH, polycyclic aromatic hydrocarbons; HCA, heterocyclic aromatic amines; AGE, advanced glycation end products; TMAO, trimethylamine-N-oxide; NOC, N-nitroso compounds.

Nitrites or nitrates added to meat for preservation could increase exogenous exposure to nitrosamines, NOC and their precursors. Dietary intake of NOC was associated with cancer risk, in particular gastrointestinal cancer. For example, in the EPIC-Norfolk study, N-nitrosodimethylamine intake was associated with increased risk of gastrointestinal cancers (hazard ratio (HR) = 1·13; 95 % CI 1·00, 1·28), specifically of rectal cancer (HR = 1·46; 95 % CI 1·16, 1·84 per 1-sd increase)(
Reference Loh, Jakszyn and Luben
31
).

High intake of salt and consumption of salted and salty foods is considered a probable risk factor for gastric cancer(

28
,
Reference D'Elia, Rossi and Ippolito
32
). Some traditional diets include substantial amounts of salt-preserved foods, including salted meat, fish or vegetables and salted foods such as bacon, sausages and ham, which contain from 3 to 5 g salt/ 100 g(

28
). High salt intake can damage the lining of the stomach, increase endogenous NOC formation, synergistically interact with gastric carcinogens, and increase the colonisation by *Helicobacter pylori*
(

28
,
Reference D'Elia, Rossi and Ippolito
32
).

Haem iron in red meat may lead to oxidative stress, which, in turn, might increase peroxidation of lipids, lead to protein modification and DNA damage(
Reference Bastide, Chenni and Audebert
33
). Haem iron also increases endogenous NOC formation  because haem in red meat can readily become nitrosylated and act as a nitrosating agent. Based on the results of the EPIC cohort, endogenous NOC formation may account for the association between red and processed meat consumption and gastric cancer risk(
Reference Jakszyn, Bingham and Pera
34
), and in a Shanghai cohort, higher  endogenous NOC formation was associated with increased risk of colorectal cancer(
Reference Dellavalle, Xiao and Yang
35
).

Heterocyclic aromatic amines (HCA) and PAH are considered carcinogenic(

36
) and have long been hypothesised to contribute to cancer risk(
Reference Abid, Cross and Sinha
37
). Several epidemiology studies did indeed observe positive associations between dietary intake of HCA and PAH with risk of different types of cancer, in particular colorectal adenomas and colorectal cancer(
Reference Rohrmann, Hermann and Linseisen
38
–
Reference Ferrucci, Sinha and Graubard
40
). However, the study results are still rather heterogeneous, which might partly be due to crude dietary assessment methods but also differences across study populations with respect to genetic background of phases I and  II enzymes responsible for HCA and PAH metabolism(
Reference Abid, Cross and Sinha
37
,
Reference Turesky and Le Marchand
41
).

A long-standing theory suggests that high saturated fat intake increases the risk of a variety of cancer types. In the USA, American Association of Retired Persons as well as in the EPIC cohort, high intake of saturated fats was associated with an increased risk of postmenopausal breast cancer, in particular among women who never used postmenopausal hormones(
Reference Thiebaut, Kipnis and Chang
42
,
Reference Sieri, Krogh and Ferrari
43
). These results support earlier findings of a pooled analysis of eight cohorts, in which high saturated fat intake tended to be associated with increased breast cancer risk (pooled RR = 1·09; 95 % CI 1·00, 1·19 for an increment of 5 % of energy from saturated fat)(
Reference Smith-Warner, Spiegelman and Adami
44
). However, for most cancer types, results are rather heterogeneous(

28
) or point towards no associations, such as for prostate cancer(
Reference Xu, Han and Zeng
45
).

A new hypothesis has been proposed by zur Hausen(
Reference zur Hausen
46
). Based on the observation that the worldwide distribution of colorectal cancer correlates with rates of beef consumption, he proposed that a specific beef factor, suspected to be one or more thermoresistant potentially oncogenic bovine viruses could contaminate beef preparations leading subsequently to latent infections in the colorectal tract. Preceding, concomitant or subsequent exposure to chemical carcinogens arising during cooking procedures can then result in increased risk for colorectal cancer synergistic with these infections(
Reference zur Hausen
46
). So far, however, no epidemiological studies have addressed this hypothesis.

## CVD

As for colorectal cancer several studies have examined the association between red and processed meat consumption and the risk of CVD, in particular, myocardial infarction, or more broadly CHD, but also stroke. In contrast to colorectal cancer, for which both unprocessed and processed red meat appear to be important, the most recent meta-analysis showed a significantly positive association of processed meat intake with CHD (RR = 1·42; 95 % CI 1·07, 1·89 per 50 g increase in daily consumption), but not with consumption of unprocessed red meat (RR = 1·00; 95 % CI 0·82, 1·23)(
Reference Micha, Michas and Mozaffarian
47
).

Less frequently studied is the association of meat consumption with the risk of stroke. In a meta-analysis that included six cohort studies(
Reference Kaluza, Wolk and Larsson
48
), the risk of total stroke increased by 11 % (95 % CI 1·03, 1·20) for each serving per d increase in fresh red meat and by 13 % (95 % CI 1·03, 1·24) for processed meat. The authors did not detect large heterogeneity among studies (*P* > 0·16). Both fresh and processed red meat were related to an increased risk of ischaemic stroke (RR = 1·13; 95 % CI 1·00, 1·27 and RR = 1·15; 95 % CI 1·06, 1·24, respectively). However, neither meat type was related to the risk of haemorrhagic stroke (fresh red meat RR = 1·08, 95 % CI 0·84, 1·39; processed meat RR = 1·16, 95 % CI 0·92, 1·46).

Several hypotheses have been formulated to explain the associations of processed meat with the risk of CVD. Adding salt (NaCl) to red meat for conservation purposes increases the naturally low sodium content of red meat. In their meta-analysis, Micha *et al*. stated that processed meats contain about 400 % more sodium and 50 % more nitrates per g(
Reference Micha, Michas and Mozaffarian
47
), although this depends strongly on the type of meat and the methods used(
Reference Linseisen, Rohrmann and Norat
49
). A high salt intake is thought to be associated with hypertension and, consequently, an increased risk of CVD(
Reference He, Li and Macgregor
50
,
Reference Aburto, Ziolkovska and Hooper
51
), although it is currently still unclear which amounts of salt intake do affect blood pressure and whether only certain subgroups of the population would particularly benefit from decreasing their salt intake(
Reference O'Donnell, Mente and Yusuf
52
). Processed meats such as sausages, salami and bacon have a higher content of SFA and cholesterol than fresh red meat; the latter is often consumed after removing the visible fat tissue, whereas the proportion of fat in sausages often reaches 50 % of weight or even more. Although numerous studies have been conducted on the association between fat intake and risk of CHD, the association appears to be yet rather unclear. A 2010 meta-analysis came to the conclusion that both high saturated fat and cholesterol intake are related to the risk of CHD(
Reference Mozaffarian, Micha and Wallace
53
), but a more recent one did not find a convincing association between dietary intake of saturated fats and coronary disease(
Reference Chowdhury, Warnakula and Kunutsor
54
). However, their effects on blood lipoproteins are well described and the latter are established causal factors in the aetiology of CVD. Nitrates and their byproducts (e.g. peroxynitrite) experimentally promote endothelial dysfunction, atherosclerosis and insulin resistance(
Reference Micha, Michas and Mozaffarian
47
).

Some other potential mechanisms do not only apply to processed meat, but to red meat in general. Firstly, haem iron in red meat may lead to oxidative stress, which, in turn, might increase peroxidation of lipids, lead to protein modification and DNA damage. Results of some studies suggested that high body iron stores (e.g. serum ferritin) could be determinants of levels of systemic oxidative DNA damage(
Reference Hori, Mizoue and Kasai
55
,
Reference Nakano, Kawanishi and Kamohara
56
) and some, but not all epidemiological studies have shown associations between body iron stores and risk of myocardial infarction(
Reference Iqbal, Mehboobali and Tareen
57
). Secondly, higher intake of red meat is related to higher intake of arachidonic acid, which leads to higher plasma concentration(
Reference Astorg, Bertrais and Laporte
58
). This may cause changes in fatty acid concentration and pattern of fatty acids of platelet membranes, and eicosanoids produced from arachidonic acid promote inflammatory and prothrombotic activities. However, dietary intake of arachidonic acid does not appear to be related to the risk of stroke(
Reference Sakai, Kakutani and Tokuda
59
) and the association of dietary or circulating arachidonic acid with CHD is yet unclear(
Reference Mozaffarian, Ascherio and Hu
60
–
Reference Reinders, van Ballegooijen and Visser
62
). More recently, US studies observed that CVD patients with higher concentrations of trimethylamine-N-oxide (TMAO) have a higher risk for major adverse cardiovascular events such as death, myocardial infarction or stroke than patients with low TMAO concentrations(
Reference Tang, Wang and Levison
63
). Intestinal bacteria metabolise the precursor of TMAO, trimethylamine, from carnitine, phosphatidylcholine (lecithin) and choline. After absorption, in a second step, trimethylamine is oxidised to TMAO in the liver(
Reference Koeth, Wang and Levison
64
,
Reference Wang, Klipfell and Bennett
65
). These trimethylamine precursors, carnitine, lecithin (phosphatidylcholine) and choline, are abundant in red meat and liver, but also fish, milk, cheese and eggs(
Reference Hamlin, Pauly and Melnyk
66
). So far, however, it is unclear if and how dietary intake of red meat or any other food affects circulating TMAO concentration in healthy individuals (
Reference Rohrmann, Linseisen and Allenspach
67
).

## Type-2 diabetes mellitus

A meta-analysis conducted by Micha *et al*. concluded that both unprocessed red meat and processed meat consumption were associated with an increased risk of type-2 diabetes. Per 50 g increase in daily processed meat consumption, the risk increased by 51 % (95 % CI 1·25, 1·81; eight cohorts), whereas the association was less strong with unprocessed red meat intake (RR = 1·19; 95 % CI 1·04, 1·37; nine cohorts; per 100 g intake)(
Reference Micha, Michas and Mozaffarian
47
). In an evaluation of the EPIC cohort, using a case–cohort design, red meat (HR: 1·08; 95 % CI 1·03, 1·13), processed meat (HR: 1·12; 95 % CI 1·05, 1·19) and meat iron intake (HR: 1·03; 95 % CI 0·99, 1·07) were associated with incident type-2 diabetes(
Reference Bendinelli, Palli and Masala
68
).

In an analysis of the α-Tocopherol β-Carotin Cancer Prevention cohort, the positive association between processed meat consumption and diabetes risk was explained more by dietary intake of sodium than by intake of SFA, protein, cholesterol, haem iron, magnesium and nitrate, and these results were not modified by obesity(
Reference Mannisto, Kontto and Kataja-Tuomola
69
). However, it is yet unclear how high sodium intake might contribute to type-2 diabetes aetiology, although salt restriction in diabetes patients might be beneficial for blood pressure control(
Reference Suckling, He and Macgregor
70
).

Based on the results of animal models, some authors hypothesised that chronic exposure to nitrosamine compounds could contribute to the pathogenesis of type-2 diabetes(
Reference Tong, Neusner and Longato
71
). Nitrosamines activated during metabolism may generate reactive oxygen species, which, in turn, can increase oxidative stress, DNA damage, lipid peroxidation and protein adduct formation. Oxidative stress and DNA damage lead to activation of pro-inflammatory cytokines and insulin resistance(
Reference de la Monte, Neusner and Chu
72
).

As for cancer and CVD, haem iron appears to be an important factor in the association between red and processed meat consumption and risk of diabetes, which is supported by the EPIC-Interact results(
Reference Bendinelli, Palli and Masala
68
). A large meta-analysis reported strong associations of serum ferritin concentration and clinically elevated transferrin saturation with an increased risk of type-2 diabetes(
Reference Orban, Schwab and Thorand
73
). These associations were even seen after adjusting for inflammatory factors. It is thought that higher body iron stores might impair insulin sensitivity and increase the risk of diabetes by promoting oxidative stress causing tissue damage(
Reference Rajpathak, Crandall and Wylie-Rosett
74
).

High amounts of advanced glycation end products are found in animal products high in protein and fat, such as meats and cheeses. In addition, higher concentrations were seen in (industrially) processed foods from animal products such as frankfurters, bacon and powdered egg whites, compared with the unprocessed forms(
Reference Peppa, Goldberg and Cai
75
). It is well-known that high circulating advanced glycation end products  levels are associated with adverse outcomes in diabetes patients(
Reference Malmstedt, Karvestedt and Swedenborg
76
–
Reference Hanssen, Beulens and van Dieren
78
), but so far no epidemiological study has evaluated whether dietary advanced glycation end products intake or circulating levels are associated with incident type-2 diabetes.

Inflammation appears to be involved in mediating the association between red meat consumption and diabetes (as well as CVD). In the EPIC-Potsdam study, a cohort with about 25 000 participants, a high consumption of red meat was associated with higher circulating levels of γ-glytamyl transferase and high-sensitivity C-reactive protein(
Reference Montonen, Boeing and Fritsche
79
). Similarly, higher red meat consumption was associated with unfavourable plasma concentrations of inflammatory and glucose metabolic markers in diabetes-free participants of the Nurses’ Health Study(
Reference Ley, Sun and Willett
80
). Interestingly, BMI accounted for a significant proportion of the observed associations with these biomarkers, except for ferritin (see the next section). The authors concluded from their analysis that the substitution of red meat with other protein food would be related to a healthier biomarker profile of inflammatory and glucose metabolism.

## Methodological considerations

### Interaction with other foods and nutrients

In EPIC, Norat *et al*. observed a strong positive association between red and processed meat intake and risk of colorectal cancer(
Reference Norat, Bingham and Ferrari
81
). However, depending on other dietary habits, i.e. fish consumption and fibre intake, the associations were different. For example, the HR in study participants with high intake of red and processed meat was 1·09 (95 % CI 0·83, 1·42) for the group with high intake of fibre (>26 g/d in women, >28 g/d in men), but 1·50 (95 % CI 1·15, 1·97) for the group with low intake of fibre (<17 g/d) compared with participants who had low intake of red and processed meat and high intake of fibre (*P* interaction = 0·06). Similar interaction was observed by fish consumption. Also, in a study on HCA intake and colorectal adenoma risk, we observed a stronger association between the intake of 2-amino-1-methyl-6-phenylimidazo(4,5-b)pyridine and adenoma risk in individuals with a flavonol intake below the median intake in the cohort, the RR progressively increased with higher 2-amino-1-methyl-6-phenylimidazo(4,5-b)pyridine intake (RR = 1·76; 95 % CI 1·17, 2·65; *P* trend 0·01; top *v*. bottom quartile). However, no statistically significant associations were observed for participants with a high flavonol intake (RR = 1·24, 95 % CI 0·85, 1·80; P trend 0·14; top *v*. bottom quartile)(
Reference Rohrmann, Hermann and Linseisen
38
). This observation is consistent with results from experimental studies in which interactive effects of phases I and II enzymes on the risk of HCA-associated cancers have been described(
Reference Hodek, Trefil and Stiborova
82
).

A third example is a potential interaction of nitrite intake from diet with intake of polyphenols on risk of gastric cancer. In a Mexcian study, a high intake of total nitrite as well as nitrate and nitrite from animal sources doubled the risk of gastric cancer (OR = 1·92; 95 % CI 1·23, 3·02, top *v*. bottom tertile)(
Reference Hernandez-Ramirez, Galvan-Portillo and Ward
83
). OR about 2-fold were observed among individuals with both low intake of cinnamic acids, secoisolariciresinol or coumestrol and high intake of animal-derived nitrate or nitrite compared with high intake of the polyphenols and low animal nitrate or nitrite intake. The results of this study suggest that polyphenols may reduce gastric cancer risk through inhibition of endogenous nitrosation(
Reference Hernandez-Ramirez, Galvan-Portillo and Ward
83
). In a similar way, vitamin C intake modified the association between N-nitrosodimethylamine intake and risk of gastrointestinal cancers in the EPIC-Norfolk cohort(
Reference Loh, Jakszyn and Luben
31
).

### Residual confounding

Problems in epidemiological studies are factors that act as confounders, i.e. are related to both the exposure and the outcome. Incomplete adjustment for such confounders result in residual confounding; this applies to factors that have not been assessed at all or to factors that have not been assessed in sufficient detail or precision. In many studies, incomplete adjustment for active (and passive) smoking may pose a problem. In the EPIC analysis on the association between meat consumption and mortality, we observed heterogeneity according to smoking (*P* interaction 0·019), with significant associations between processed meat intake and all-cause mortality only in former and current smokers but no significant associations in never smokers(
Reference Rohrmann, Overvad and Bueno-de-Mesquita
24
).

### Heterogeneity between studies

As described earlier, several meta-analyses have been conducted using studies from a variety of settings that differ in time, place and type of dietary assessment. All these factors may contribute to heterogeneity in study results. For example, in their meta-analysis on meat consumption and all-cause mortality, Larsson *et al*. pointed out that, although most studies observed positive associations, formal tests for heterogeneity were statistically significant(
Reference Larsson and Orsini
26
). This heterogeneity might be due to different meat consumption habits and, thus, differences in the range of red and processed meat consumption in a population (e.g. higher in the USA than in East Asia), to differences in foods that contribute to meat consumption categories (e.g. different types of processed meats consumed in different populations) and to the length of follow-up(
Reference Larsson and Orsini
26
). Another factor that contributes to heterogeneity in study results is differences in adjustment variables as shown in a meta-analysis of meat consumption and colorectal cancer risk(
Reference Hernandez-Ramirez, Galvan-Portillo and Ward
84
).

## Conclusions

Processed meat, which is mostly processed red meat, but might also include white meat, is associated with increased all-cause mortality and also with increased risk of some types of cancer (such as colorectal and gastric cancer), CVD and type-2 diabetes. Although most epidemiological studies point towards such an association, the strength of the association appears to be unclear. For example, the associations between processed meat consumption and all-cause mortality appear to be much stronger in the USA(
Reference Sinha, Cross and Graubard
19
,
Reference Pan, Sun and Bernstein
23
) than among European(
Reference Rohrmann, Overvad and Bueno-de-Mesquita
24
) studies. The reasons for this discrepancy are still unclear.

Factors that are associated with total meat and in particular with processed meat consumption, and can act as confounders need to be addressed carefully in epidemiological studies as lifestyle differs between individuals with high and low processed meat consumption. Information from other types of studies in human subjects are needed to support a causal role of processed meat in the aetiology of chronic diseases. Using the Bradford Hill criteria simply based on epidemiological studies is not sufficient because it does not preclude misinterpretation due to confounding or bias(
Reference Mente, de Koning and Shannon
85
). However, trials that randomise individuals into a low consumption *v*. control group are difficult to conduct, in particular if the outcome is a ‘hard’ endpoint, such as cancer, myocardial infarction or diabetes. Using intermediate endpoints, such as changes in blood lipids, concentration of advanced glycation end products or DNA adducts is difficult, too, because the link between these markers and incident disease or mortality is not unique, such that high cholesterol concentrations might be linked to CHD but also some types of cancer. Other approaches, such as studies using the Mendelian randomisation approach, may help to establish causal associations between processed meat consumption and risk of chronic diseases.

If, however, after careful evaluation of existing studies, it will turn out that the processed meat consumption is indeed causally associated with chronic diseases, it needs to be addressed which factors are responsible for these associations and how the risk might be reduced.

## Financial Support

None.

## Conflicts of Interest

None.

## Authorship

S. R. drafted the manuscript. J. L. reviewed and revised the manuscript.

---

## References

1

1.
Food and Agriculture Organization of the United Nations (FAO) (2006) Lifestock's Long Shadow – Environmental Issues and Options. Rome: FAO.Google Scholar

2

2.
Payne, CL, Scarborough, P, Rayner, M
et al. (2015) Are edible insects more or less ‘healthy’ than commonly consumed meats? A comparison using two nutrient profiling models developed to combat over- and undernutrition. Eur J Clin Nutr. [Epublication ahead of print]Google Scholar

3

3.
Linseisen, J, Kesse, E, Slimani, N
et al. (2002) Meat consumption in the European prospective investigation into cancer and nutrition (EPIC) cohorts: results from 24-hour dietary recalls. Public Health Nutr
5, 1243–1258.CrossRefGoogle ScholarPubMed

4

4.
Pearson, A & Gillett, T (editors) (1996) Processed Meats, 3rd ed.
Philadelphia: Springer Science & Business Media.Google Scholar

5

5.
Toldra, F & Flores, M (1998) The role of muscle proteases and lipases in flavor development during the processing of dry-cured ham. Crit Rev Food Sci Nutr
38, 331–352.CrossRefGoogle ScholarPubMed

6

6.
Honikel, KO (editor) (1995) The Use of Additives in Meat Products Throughout Europe. Necessity, Customs, Legislation. Utrecht: ECCEAMST.Google Scholar

7

7.
Bingham, SA, Hughes, R & Cross, AJ (2002) Effect of white versus red meat on endogenous N-nitrosation in the human colon and further evidence of a dose response. J Nutr
132, 3522S–3525S.Google Scholar

8

8.
Simko, P (2002) Determination of polycyclic aromatic hydrocarbons in smoked meat products and smoke flavouring food additives. J Chromatogr B Analyt Technol Biomed Life Sci
770, 3–18.Google Scholar

9

9.
Behsnilian, D, Butz, P, Greiner, R
et al. (2014) Process-induced undesirable compounds: chances of non-thermal approaches. Meat Sci
98, 392–403.Google Scholar

10

10.
Lijinsky, W (1999) N-nitroso compounds in the diet. Mutat Res
443, 129–138.Google Scholar

11

11.
Haorah, J, Zhou, L, Wang, X
et al. (2001) Determination of total N-nitroso compounds and their precursors in frankfurters, fresh meat, dried salted fish, sauces, tobacco, and tobacco smoke particulates. J Agric Food Chem
49, 6068–6078.Google Scholar

12

12.
Kahn, HA, Phillips, RL, Snowdon, DA
et al. (1984) Association between reported diet and all-cause mortality. Twenty-one-year follow-up on 27,530 adult Seventh-Day Adventists. Am J Epidemiol
119, 775–787.Google Scholar

13

13.
Whiteman, D, Muir, J, Jones, L
et al. (1999) Dietary questions as determinants of mortality: the OXCHECK experience. Public Health Nutr
2, 477–487.Google Scholar

14

14.
Fraser, GE (1999) Associations between diet and cancer, ischemic heart disease, and all-cause mortality in non-Hispanic white California Seventh-day Adventists. Am J Clin Nutr
70, 532S–538S.Google Scholar

15

15.
Fortes, C, Forastiere, F, Farchi, S
et al. (2000) Diet and overall survival in a cohort of very elderly people. Epidemiology
11, 440–445.Google Scholar

16

16.
Appleby, PN, Key, TJ, Thorogood, M
et al. (2002) Mortality in British vegetarians. Public Health Nutr
5, 29–36.Google Scholar

17

17.
Kelemen, LE, Kushi, LH, Jacobs, DR Jr
et al. (2005) Associations of dietary protein with disease and mortality in a prospective study of postmenopausal women. Am J Epidemiol
161, 239–249.Google Scholar

18

18.
Chang-Claude, J, Hermann, S, Eilber, U
et al. (2005) Lifestyle determinants and mortality in German vegetarians and health-conscious persons: results of a 21-year follow-up. Cancer Epidemiol Biomarkers Prev
14, 963–968.Google Scholar

19

19.
Sinha, R, Cross, AJ, Graubard, BI
et al. (2009) Meat intake and mortality: a prospective study of over half a million people. Arch Intern Med
169, 562–571.Google Scholar

20

20.
Key, TJ, Appleby, PN, Spencer, EA
et al. (2009) Mortality in British vegetarians: results from the European Prospective Investigation into Cancer and Nutrition (EPIC-Oxford). Am J Clin Nutr
89, 1613S–1619S.Google Scholar

21

21.
Trichopoulou, A, Bamia, C & Trichopoulos, D (2009) Anatomy of health effects of Mediterranean diet: Greek EPIC prospective cohort study. BMJ
338, b2337.CrossRefGoogle ScholarPubMed

22

22.
Nagao, M, Iso, H, Yamagishi, K
et al. (2012) Meat consumption in relation to mortality from cardiovascular disease among Japanese men and women. Eur J Clin Nutr
66, 687–693.Google Scholar

23

23.
Pan, A, Sun, Q, Bernstein, AM
et al. (2012) Red meat consumption and mortality: results from 2 prospective cohort studies. Arch Intern Med
172, 555–563.Google Scholar

24

24.
Rohrmann, S, Overvad, K, Bueno-de-Mesquita, HB
et al. (2013) Meat consumption and mortality – results from the European Prospective Investigation into Cancer and Nutrition. BMC Med
11, 63.CrossRefGoogle ScholarPubMed

25

25.
Abete, I, Romaguera, D, Vieira, AR
et al. (2014) Association between total, processed, red and white meat consumption and all-cause, CVD and IHD mortality: a meta-analysis of cohort studies. Br J Nutr
112, 762–775.Google Scholar

26

26.
Larsson, SC & Orsini, N (2014) Red meat and processed meat consumption and all-cause mortality: a meta-analysis. Am J Epidemiol
179, 282–289.Google Scholar

27

27.
Wang, X, Lin, X, Ouyang, YY
et al. (2015) Red and processed meat consumption and mortality: dose-response meta-analysis of prospective cohort studies. Public Health Nutr [Epublication ahead of print].Google Scholar

28

28.
American Institute for Cancer Research/World Cancer Research Fund (2007) Food, Nutrition, Physical Activity, and the Prevention of Cancer: a Global Perspective [AICR, editor]. Washington, DC: AICR.Google Scholar

29

29.
World Cancer Research Fund/American Institute for Cancer Research (2011) Food, Nutrition, Physical Activity, and the Prevention of Colorectal Cancer. Washington, DC: AICR.Google Scholar

30

30.
Bouvard, Vr, Loomis, D, Guyton, KZ
et al. (2015) Carcinogenicity of consumption of red and processed meat. Lancet Oncol [Epublication ahead of print].Google Scholar

31

31.
Loh, YH, Jakszyn, P, Luben, RN
et al. (2011) N-Nitroso compounds and cancer incidence: the European Prospective Investigation into Cancer and Nutrition (EPIC)-Norfolk study. Am J Clin Nutr
93, 1053–1061.Google Scholar

32

32.
D'Elia, L, Rossi, G, Ippolito, R
et al. (2012) Habitual salt intake and risk of gastric cancer: a meta-analysis of prospective studies. Clin Nutr
31, 489–498.Google Scholar

33

33.
Bastide, NM, Chenni, F, Audebert, M
et al. (2015) A central role for heme iron in colon carcinogenesis associated with red meat intake. Cancer Res
75, 870–879.Google Scholar

34

34.
Jakszyn, P, Bingham, S, Pera, G
et al. (2006) Endogenous versus exogenous exposure to N-nitroso compounds and gastric cancer risk in the European Prospective Investigation into Cancer and Nutrition (EPIC-EURGAST) study. Carcinogenesis
27, 1497–1501.Google Scholar

35

35.
Dellavalle, CT, Xiao, Q, Yang, G
et al. (2014) Dietary nitrate and nitrite intake and risk of colorectal cancer in the Shanghai Women's Health Study. Int J Cancer
134, 2917–2926.Google Scholar

36

36.
International Agency for Research on Cancer (1993) Heterocyclic Aromatic Amines. Some Naturally Occurring Substances: Food Items and Constituents, Heterocyclic Aromatic Amines and Mycotoxins, pp. 165–242. Lyon: IARC.Google Scholar

37

37.
Abid, Z, Cross, AJ & Sinha, R (2014) Meat, dairy, and cancer. Am J Clin Nutr
100, Suppl. 1, 386S–393S.CrossRefGoogle ScholarPubMed

38

38.
Rohrmann, S, Hermann, S & Linseisen, J (2009) Heterocyclic aromatic amine intake increases colorectal adenoma risk: findings from a prospective European cohort study. Am J Clin Nutr
89, 1418–1424.Google Scholar

39

39.
Cross, AJ, Ferrucci, LM, Risch, A
et al. (2010) A large prospective study of meat consumption and colorectal cancer risk: an investigation of potential mechanisms underlying this association. Cancer Res
70, 2406–2414.CrossRefGoogle ScholarPubMed

40

40.
Ferrucci, LM, Sinha, R, Graubard, BI
et al. (2009) Dietary meat intake in relation to colorectal adenoma in asymptomatic women. Am J Gastroenterol
104, 1231–1240.Google Scholar

41

41.
Turesky, RJ & Le Marchand, L (2011) Metabolism and biomarkers of heterocyclic aromatic amines in molecular epidemiology studies: lessons learned from aromatic amines. Chem Res Toxicol
24, 1169–1214.Google Scholar

42

42.
Thiebaut, AC, Kipnis, V, Chang, SC
et al. (2007) Dietary fat and postmenopausal invasive breast cancer in the National Institutes of Health-AARP Diet and Health Study cohort. J Natl Cancer Inst
99, 451–462.Google Scholar

43

43.
Sieri, S, Krogh, V, Ferrari, P
et al. (2008) Dietary fat and breast cancer risk in the European Prospective Investigation into Cancer and Nutrition. Am J Clin Nutr
88, 1304–1312.Google Scholar

44

44.
Smith-Warner, SA, Spiegelman, D, Adami, HO
et al. (2001) Types of dietary fat and breast cancer: a pooled analysis of cohort studies. Int J Cancer
92, 767–774.Google Scholar

45

45.
Xu, C, Han, FF, Zeng, XT
et al. (2015) Fat intake is not linked to prostate cancer: a systematic review and dose-response meta-analysis. PLoS ONE
10, e0131747.Google Scholar

46

46.
zur Hausen, H (2012) Red meat consumption and cancer: reasons to suspect involvement of bovine infectious factors in colorectal cancer. Int J Cancer
130, 2475–2483.CrossRefGoogle ScholarPubMed

47

47.
Micha, R, Michas, G & Mozaffarian, D (2012) Unprocessed red and processed meats and risk of coronary artery disease and type 2 diabetes–an updated review of the evidence. Curr Atheroscler Rep
14, 515–524.Google Scholar

48

48.
Kaluza, J, Wolk, A & Larsson, SC (2012) Red meat consumption and risk of stroke: a meta-analysis of prospective studies. Stroke
43, 2556–2560.Google Scholar

49

49.
Linseisen, J, Rohrmann, S, Norat, T
et al. (2006) Dietary intake of different types and characteristics of processed meat which might be associated with cancer risk–results from the 24-hour diet recalls in the European Prospective Investigation into Cancer and Nutrition (EPIC). Public Health Nutr
9, 449–464.Google Scholar

50

50.
He, FJ, Li, J & Macgregor, GA (2013) Effect of longer term modest salt reduction on blood pressure: Cochrane systematic review and meta-analysis of randomised trials. BMJ
346, f1325.Google Scholar

51

51.
Aburto, NJ, Ziolkovska, A, Hooper, L
et al. (2013) Effect of lower sodium intake on health: systematic review and meta-analyses. BMJ
346, f1326.Google Scholar

52

52.
O'Donnell, M, Mente, A & Yusuf, S (2015) Sodium intake and cardiovascular health. Circ Res
116, 1046–1057.Google Scholar

53

53.
Mozaffarian, D, Micha, R & Wallace, S (2010) Effects on coronary heart disease of increasing polyunsaturated fat in place of saturated fat: a systematic review and meta-analysis of randomized controlled trials. PLoS Med
7, e1000252.Google Scholar

54

54.
Chowdhury, R, Warnakula, S, Kunutsor, S
et al. (2014) Association of dietary, circulating, and supplement fatty acids with coronary risk: a systematic review and meta-analysis. Ann Intern Med
160, 398–406.Google Scholar

55

55.
Hori, A, Mizoue, T, Kasai, H
et al. (2010) Body iron store as a predictor of oxidative DNA damage in healthy men and women. Cancer Sci
101, 517–522.Google Scholar

56

56.
Nakano, M, Kawanishi, Y, Kamohara, S
et al. (2003) Oxidative DNA damage (8-hydroxydeoxyguanosine) and body iron status: a study on 2507 healthy people. Free Radic Biol Med
35, 826–832.Google Scholar

57

57.
Iqbal, MP, Mehboobali, N, Tareen, AK
et al. (2013) Association of body iron status with the risk of premature acute myocardial infarction in a Pakistani population. PLoS ONE
8, e67981.CrossRefGoogle Scholar

58

58.
Astorg, P, Bertrais, S, Laporte, F
et al. (2008) Plasma *n*-6 and *n*-3 polyunsaturated fatty acids as biomarkers of their dietary intakes: a cross-sectional study within a cohort of middle-aged French men and women. Eur J Clin Nutr
62, 1155–1161.Google Scholar

59

59.
Sakai, M, Kakutani, S, Tokuda, H
et al. (2014) Arachidonic acid and cerebral ischemia risk: a systematic review of observational studies. Cerebrovasc Dis Extra
4, 198–211.Google Scholar

60

60.
Mozaffarian, D, Ascherio, A, Hu, FB
et al. (2005) Interplay between different polyunsaturated fatty acids and risk of coronary heart disease in men. Circulation
111, 157–164.Google Scholar

61

61.
de Oliveira Otto, MC, Wu, JH, Baylin, A
et al. (2013) Circulating and dietary omega-3 and omega-6 polyunsaturated fatty acids and incidence of CVD in the Multi-Ethnic Study of Atherosclerosis. J Am Heart Assoc
2, e000506.Google Scholar

62

62.
Reinders, I, van Ballegooijen, AJ, Visser, M
et al. (2013) Associations of serum *n*-3 and *n*-6 polyunsaturated fatty acids with echocardiographic measures among older adults: the Hoorn Study. Eur J Clin Nutr
67, 1277–1283.CrossRefGoogle ScholarPubMed

63

63.
Tang, WH, Wang, Z, Levison, BS
et al. (2013) Intestinal microbial metabolism of phosphatidylcholine and cardiovascular risk. N Engl J Med. 368, 1575–1584.Google Scholar

64

64.
Koeth, RA, Wang, Z, Levison, BS
et al. (2013) Intestinal microbiota metabolism of L-carnitine, a nutrient in red meat, promotes atherosclerosis. Nat Med. 19, 576–585.Google Scholar

65

65.
Wang, Z, Klipfell, E, Bennett, BJ
et al. (2011) Gut flora metabolism of phosphatidylcholine promotes cardiovascular disease. Nature
472, 57–63.Google Scholar

66

66.
Hamlin, JC, Pauly, M, Melnyk, S
et al. (2013) Dietary intake and plasma levels of choline and betaine in children with autism spectrum disorders. Autism Res Treat
2013, 578429.Google Scholar

67

67.
Rohrmann, S, Linseisen, J, Allenspach, M
et al. (2015) Plasma concentrations of trimethylamine-N-oxide are directly associated with dairy consumption and low-grade inflammation in a German adult population. J Nutr (In the Press).Google Scholar

68

68.
Bendinelli, B, Palli, D, Masala, G
et al. (2013) Association between dietary meat consumption and incident type 2 diabetes: the EPIC-InterAct study. Diabetologia
56, 47–59.Google Scholar

69

69.
Mannisto, S, Kontto, J, Kataja-Tuomola, M
et al. (2010) High processed meat consumption is a risk factor of type 2 diabetes in the Alpha-Tocopherol, Beta-Carotene Cancer Prevention study. Br J Nutr
103, 1817–1822.Google Scholar

70

70.
Suckling, RJ, He, FJ & Macgregor, GA (2010) Altered dietary salt intake for preventing and treating diabetic kidney disease. Cochrane Database Syst Rev
CD006763.Google Scholar

71

71.
Tong, M, Neusner, A, Longato, L
et al. (2009) Nitrosamine exposure causes insulin resistance diseases: relevance to type 2 diabetes mellitus, non-alcoholic steatohepatitis, and Alzheimer's disease. J Alzheimers Dis
17, 827–844.Google Scholar

72

72.
de la Monte, SM, Neusner, A, Chu, J
et al. (2009) Epidemilogical trends strongly suggest exposures as etiologic agents in the pathogenesis of sporadic Alzheimer's disease, diabetes mellitus, and non-alcoholic steatohepatitis. J Alzheimers Dis
17, 519–529.Google Scholar

73

73.
Orban, E, Schwab, S, Thorand, B
et al. (2014) Association of iron indices and type 2 diabetes: a meta-analysis of observational studies. Diab Metab Res Rev
30, 372–394.Google Scholar

74

74.
Rajpathak, SN, Crandall, JP, Wylie-Rosett, J
et al. (2009) The role of iron in type 2 diabetes in humans. Biochim Biophys Acta
1790, 671–681.Google Scholar

75

75.
Peppa, M, Goldberg, T, Cai, W
et al. (2002) Glycotoxins: a missing link in the ‘relationship of dietary fat and meat intake in relation to risk of type 2 diabetes in men’. Diab Care
25, 1898–1899.Google Scholar

76

76.
Malmstedt, J, Karvestedt, L, Swedenborg, J
et al. (2015) The receptor for advanced glycation end products and risk of peripheral arterial disease, amputation or death in type 2 diabetes: a population-based cohort study. Cardiovasc Diabetol
14, 93.Google Scholar

77

77.
Thomas, MC, Woodward, M, Neal, B
et al. (2015) The relationship between levels of advanced glycation end-products and their soluble receptor and adverse outcomes in adults with type 2 diabetes. Diabetes Care
38, 1891–1897.Google Scholar

78

78.
Hanssen, NM, Beulens, JW, van Dieren, S
et al. (2015) Plasma advanced glycation end products are associated with incident cardiovascular events in individuals with type 2 diabetes: a case-cohort study with a median follow-up of 10 years (EPIC-NL). Diabetes
64, 257–265.Google Scholar

79

79.
Montonen, J, Boeing, H, Fritsche, A
et al. (2013) Consumption of red meat and whole-grain bread in relation to biomarkers of obesity, inflammation, glucose metabolism and oxidative stress. Eur J Nutr
52, 337–345.Google Scholar

80

80.
Ley, SH, Sun, Q, Willett, WC
et al. (2014) Associations between red meat intake and biomarkers of inflammation and glucose metabolism in women. Am J Clin Nutr
99, 352–360.CrossRefGoogle Scholar

81

81.
Norat, T, Bingham, S, Ferrari, P
et al. (2005) Meat, fish, and colorectal cancer risk: the European prospective investigation into cancer and nutrition. J Natl Cancer Inst
97, 906–916.Google Scholar

82

82.
Hodek, P, Trefil, P & Stiborova, M (2002) Flavonoids-potent and versatile biologically active compounds interacting with cytochromes P450. Chem Biol Interact
139, 1–21.Google Scholar

83

83.
Hernandez-Ramirez, RU, Galvan-Portillo, MV, Ward, MH
et al. (2009) Dietary intake of polyphenols, nitrate and nitrite and gastric cancer risk in Mexico City. Int J Cancer
125, 1424–1430.Google Scholar

84

84.
Chan, DS, Lau, R, Aune, D
et al. (2011) Red and processed meat and colorectal cancer incidence: meta-analysis of prospective studies. PLoS ONE
6, e20456.Google Scholar

85

85.
Mente, A, de Koning, L, Shannon, HS
et al. (2009) A systematic review of the evidence supporting a causal link between dietary factors and coronary heart disease. Arch Intern Med
169, 659–669.Google Scholar

View in content

Table 1. Association between red and processed meat consumption and all-cause and cause-specific mortality: results of meta-analyses

---

View in content

Table 2. Potential mechanisms connecting meat consumption and risk of chronic diseases

You have 
Access

61
:   Cited by

---

# Cited by

Loading...

Cited by

- 61

Crossref Citations

##### This article has been cited by the following publications. This list is generated based on data provided by Crossref.

---

Google Scholar Citations

View all Google Scholar citations
for this article.

×

- Librarians
- Authors
- Publishing partners
- Agents
- Corporates

- Additional Information

  - Accessibility
  - Our blog
  - News
  - Contact and help
  - Cambridge Core legal notices
  - Feedback
  - Sitemap

  Select your country preference

  Afghanistan
  Aland Islands
  Albania
  Algeria
  American Samoa
  Andorra
  Angola
  Anguilla
  Antarctica
  Antigua and Barbuda
  Argentina
  Armenia
  Aruba
  Australia
  Austria
  Azerbaijan
  Bahamas
  Bahrain
  Bangladesh
  Barbados
  Belarus
  Belgium
  Belize
  Benin
  Bermuda
  Bhutan
  Bolivia
  Bosnia and Herzegovina
  Botswana
  Bouvet Island
  Brazil
  British Indian Ocean Territory
  Brunei Darussalam
  Bulgaria
  Burkina Faso
  Burundi
  Cambodia
  Cameroon
  Canada
  Cape Verde
  Cayman Islands
  Central African Republic
  Chad
  Channel Islands, Isle of Man
  Chile
  China
  Christmas Island
  Cocos (Keeling) Islands
  Colombia
  Comoros
  Congo
  Congo, The Democratic Republic of the
  Cook Islands
  Costa Rica
  Cote D'Ivoire
  Croatia
  Cuba
  Cyprus
  Czech Republic
  Denmark
  Djibouti
  Dominica
  Dominican Republic
  East Timor
  Ecuador
  Egypt
  El Salvador
  Equatorial Guinea
  Eritrea
  Estonia
  Ethiopia
  Falkland Islands (Malvinas)
  Faroe Islands
  Fiji
  Finland
  France
  French Guiana
  French Polynesia
  French Southern Territories
  Gabon
  Gambia
  Georgia
  Germany
  Ghana
  Gibraltar
  Greece
  Greenland
  Grenada
  Guadeloupe
  Guam
  Guatemala
  Guernsey
  Guinea
  Guinea-bissau
  Guyana
  Haiti
  Heard and Mc Donald Islands
  Honduras
  Hong Kong
  Hungary
  Iceland
  India
  Indonesia
  Iran, Islamic Republic of
  Iraq
  Ireland
  Israel
  Italy
  Jamaica
  Japan
  Jersey
  Jordan
  Kazakhstan
  Kenya
  Kiribati
  Korea, Democratic People's Republic of
  Korea, Republic of
  Kuwait
  Kyrgyzstan
  Lao People's Democratic Republic
  Latvia
  Lebanon
  Lesotho
  Liberia
  Libyan Arab Jamahiriya
  Liechtenstein
  Lithuania
  Luxembourg
  Macau
  Macedonia
  Madagascar
  Malawi
  Malaysia
  Maldives
  Mali
  Malta
  Marshall Islands
  Martinique
  Mauritania
  Mauritius
  Mayotte
  Mexico
  Micronesia, Federated States of
  Moldova, Republic of
  Monaco
  Mongolia
  Montenegro
  Montserrat
  Morocco
  Mozambique
  Myanmar
  Namibia
  Nauru
  Nepal
  Netherlands
  Netherlands Antilles
  New Caledonia
  New Zealand
  Nicaragua
  Niger
  Nigeria
  Niue
  Norfolk Island
  Northern Mariana Islands
  Norway
  Oman
  Pakistan
  Palau
  Palestinian Territory, Occupied
  Panama
  Papua New Guinea
  Paraguay
  Peru
  Philippines
  Pitcairn
  Poland
  Portugal
  Puerto Rico
  Qatar
  Reunion
  Romania
  Russian Federation
  Rwanda
  Saint Kitts and Nevis
  Saint Lucia
  Saint Vincent and the Grenadines
  Samoa
  San Marino
  Sao Tome and Principe
  Saudi Arabia
  Senegal
  Serbia
  Seychelles
  Sierra Leone
  Singapore
  Slovakia
  Slovenia
  Solomon Islands
  Somalia
  South Africa
  South Georgia and the South Sandwich Islands
  Spain
  Sri Lanka
  St. Helena
  St. Pierre and Miquelon
  Sudan
  Suriname
  Svalbard and Jan Mayen Islands
  Swaziland
  Sweden
  Switzerland
  Syrian Arab Republic
  Taiwan
  Tajikistan
  Tanzania, United Republic of
  Thailand
  Togo
  Tokelau
  Tonga
  Trinidad and Tobago
  Tunisia
  Türkiye
  Turkmenistan
  Turks and Caicos Islands
  Tuvalu
  Uganda
  Ukraine
  United Arab Emirates
  United Kingdom
  United States
  United States Minor Outlying Islands
  United States Virgin Islands
  Uruguay
  Uzbekistan
  Vanuatu
  Vatican City
  Venezuela
  Vietnam
  Virgin Islands (British)
  Wallis and Futuna Islands
  Western Sahara
  Yemen
  Zambia
  Zimbabwe

  ## Join us online

- Legal Information

  - Rights & Permissions
  - Copyright
  - Privacy Notice
  - Terms of use
  - Cookies Policy
  - © Cambridge University Press 2024
  - Back to top

- © Cambridge University Press 2024
- Back to top

# 

Cancel

Confirm

×

# Save article to Kindle

To save this article to your Kindle, first ensure coreplatform@cambridge.org is added to your Approved Personal Document E-mail List under your Personal Document Settings on the Manage Your Content and Devices page of your Amazon account. Then enter the ‘name’ part of your Kindle email address below.
Find out more about saving to your Kindle.

Note you can select to save to either the @free.kindle.com or @kindle.com variations. ‘@free.kindle.com’ emails are free but can only be saved to your device when it is connected to wi-fi. ‘@kindle.com’ emails can be delivered even when you are not connected to wi-fi, but note that service fees apply.

Find out more about the Kindle Personal Document Service.

Processed meat: the real villain?

- Volume 75, Issue 3
- Sabine Rohrmann (a1) and Jakob Linseisen (a2)
- DOI: https://doi.org/10.1017/S0029665115004255

Your Kindle email address

Please provide your Kindle email.

@free.kindle.com
@kindle.com (service fees apply)

Available formats

 PDF
Please select a format to save.

By using this service, you agree that you will only keep content for personal use, and will not openly distribute them via Dropbox, Google Drive or other file sharing services
Please confirm that you accept the terms of use.

Cancel

Save

×

# Save article to Dropbox

To save this article to your Dropbox account, please select one or more formats and confirm that you agree to abide by our usage policies. If this is the first time you used this feature, you will be asked to authorise Cambridge Core to connect with your Dropbox account.
Find out more about saving content to Dropbox.

Processed meat: the real villain?

- Volume 75, Issue 3
- Sabine Rohrmann (a1) and Jakob Linseisen (a2)
- DOI: https://doi.org/10.1017/S0029665115004255

Available formats

 PDF
Please select a format to save.

By using this service, you agree that you will only keep content for personal use, and will not openly distribute them via Dropbox, Google Drive or other file sharing services
Please confirm that you accept the terms of use.

Cancel

Save

×

# Save article to Google Drive

To save this article to your Google Drive account, please select one or more formats and confirm that you agree to abide by our usage policies. If this is the first time you used this feature, you will be asked to authorise Cambridge Core to connect with your Google Drive account.
Find out more about saving content to Google Drive.

Processed meat: the real villain?

- Volume 75, Issue 3
- Sabine Rohrmann (a1) and Jakob Linseisen (a2)
- DOI: https://doi.org/10.1017/S0029665115004255

Available formats

 PDF
Please select a format to save.

By using this service, you agree that you will only keep content for personal use, and will not openly distribute them via Dropbox, Google Drive or other file sharing services
Please confirm that you accept the terms of use.

Cancel

Save

×

×

#### Reply to: Submit a response

Title \*
Please enter a title for your response.

Contents \*


Contents help

Close Contents help

- No HTML tags allowed  
- Web page URLs will display as text only  
- Lines and paragraphs break automatically  
- Attachments, images or tables are not permitted

Please enter your response.

---

#### Your details

First name \*
Please enter your first name.

Last name \*
Please enter your last name.

Email \*


Email help

Close Email help

Your email address will be used in order to notify you when your comment has been reviewed by the moderator and in case the author(s) of the article or the moderator need to contact you directly.

Please enter a valid email address.

Occupation
Please enter your occupation.

Affiliation
Please enter any affiliation.

---

##### You have entered the maximum number of contributors

---
